# Supplementary material for: Mast cell stabilizing effect of a geranyl acetophenone in dengue virus infection using in vitro model of DENV3-induced RBL-2H3 cells
Source: PubMed Central journal article supplement (PMC6549089; doi:10.1042/bsr20181273), 2019-06-04
Supplement: bsr20181273_Supp1.pdf [file bsr20181273_Supp1.pdf]

## Supplementary Data

### Analysis on the Release of $\beta$ -hexosaminidase by RBL-2H3 Cells Induced by Calcium Ionophore and Pretreated by tHGA

To determine the effect of tHGA on the release of  $\beta$ -hexosaminidase upon calcium ionophore induction, the following protocol was performed. Briefly, RBL-2H3 cells ( $4 \times 10^4$  cells/well) were seeded for 24 hrs at  $37^\circ\text{C}$  in a 5%  $\text{CO}_2$  humidified incubator. On the next day, cells were treated with different concentrations of tHGA (1.25, 5 and 20  $\mu\text{M}$ ) for 20 min. Cells were also treated with positive controls - quercetin (30  $\mu\text{M}$ ) for 20 min. After that, the cells were induced with 5  $\mu\text{M}$  of calcium ionophore for 1 hr. Subsequently the release of  $\beta$ -hexosaminidase was determined as in Protocol 4.6 whereby the supernatant of spontaneous released  $\beta$ -hexosaminidase and lysed cells' released  $\beta$ -hexosaminidase were incubated with pNAG for 1 hr and the absorbance readings were read at 450 nm.

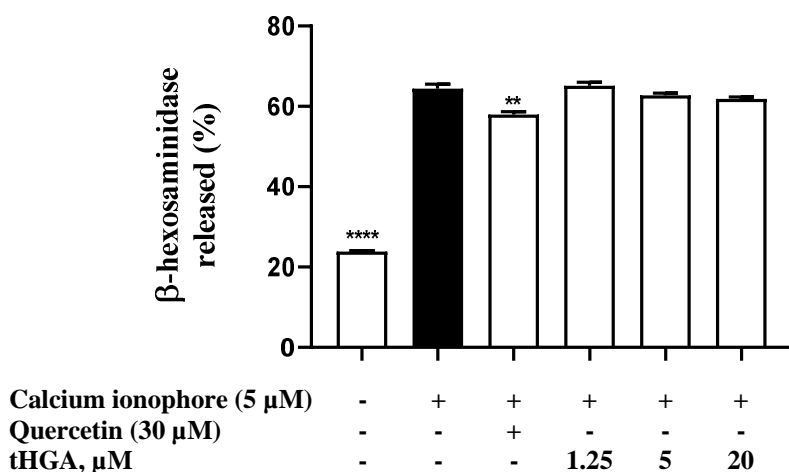

**The effect of tHGA on the release of  $\beta$ -hexosaminidase by calcium ionophore-induced RBL-2H3 cells.** RBL-2H3 cells were pre-treated with tHGA (1.25, 5 and 20  $\mu\text{M}$ ) for 20 min followed by the induction of calcium ionophore at 5  $\mu\text{M}$  for 1 hr to induce degranulation. The percentage of  $\beta$ -hexosaminidase release was calculated against the total amount of  $\beta$ -hexosaminidase being released by calcium ionophore-induced RBL-2H3 cells. Results are expressed as the mean  $\pm$  S.E.M. of three independent experiments. \*\*\*\*P<0.005 as compared to the calcium ionophore-induced RBL-2H3 group (black bar).
